# Supplementary material
Source: PubMed Central journal article supplement (PMC3309129)
Supplement: supp_djs003_jnci-JNCI-11-0874-s01.pdf [file supp_djs003_jnci-JNCI-11-0874-s01.pdf]

## SUPPLEMENTARY METHODS

### Study Participants and Eligibility

Thirteen villages were selected at random from four townships in Linqu County, Shandong Province, and a census identified 4010 inhabitants aged 35–64 years. Of these, 3599 subjects underwent gastroscopy with biopsy in 1994 and were invited to participate in the randomized Shandong Intervention Trial. A total of 3411 subjects who were thought to be eligible and provided written informed consent were then randomly assigned to treatment (Supplementary Figure 1). Eligibility exclusions before randomization included lack of written informed consent, residence outside the study villages, allergy to penicillin, deceased, missing baseline *Helicobacter pylori* serology, age outside the range of 35–64 years, previous treatment for *H. pylori*, previous cancer diagnosis (except nonmelanoma skin cancer), bleeding disorder, heart failure, emphysema, renal or liver disease, or other life-threatening illness. After randomization, which took place on July 23, 1995, investigators who did not know the treatment assignments or gastric cancer or gastric histopathology status reviewed eligibility data in January 2005, in preparation for a publication on the results of the trial (1). That review determined that 46 subjects were initially ineligible (two had died, 38 had a diagnosis of gastric cancer, and six had another cancer other than skin cancer before randomization). Data from the remaining 3365 eligible randomly assigned subjects were presented in the earlier publication (1) and in this paper. The original randomized trial and the study extension were approved by the Institutional Review Boards of the Beijing Institute for Cancer Research, the National Cancer Institute, and Westat, and separate written informed consent was obtained for the extended follow-up. The Shandong Intervention Trial is registered at the National Cancer Institute PDQ database (trial number NCI-OH-95-C-N029; available at <http://www.cancer.gov/clinicaltrials/>).

### Design, Randomization, and Masking

The trial was stratified into *H. pylori*-seropositive vs *H. pylori*-seronegative subjects, as determined from serum drawn in 1994 (2). *H. pylori*-seropositive subjects were randomly assigned to three interventions or their placebos in a 2×2×2 factorial design, whereas *H. pylori*-seronegative subjects were randomly assigned in a 2×2 factorial trial of vitamin and garlic supplements but also received placebo for antibiotics to preserve masking (Supplementary Figure 1). Random treatments assignments were constrained to be balanced within groups of patients defined by age and sex, and participants and investigators were masked to treatment

assignment (2). Random treatment assignments were generated at Westat in the United States after eligibility was determined, and coded pill bottles were then distributed in Linqu County.

## **Treatments**

Amoxicillin (1 g) and omeprazole (20 mg) (n = 1130) or placebo (n = 1128) were given twice daily for 2 weeks from September 15 to November 29 of 1995. A repeat 2-week course of active treatment was offered to the 382 subjects for whom the initial course of active therapy did not eradicate *H. pylori*, as determined by <sup>13</sup>C-urea breath tests conducted in January to March of 1996. To preserve masking, 383 subjects assigned to placebo and matched on village, age, and sex were offered retreatment with placebo. We call this treatment “*H. pylori* treatment.” Vitamin and garlic oral supplements began in November of 1995 and continued to March 31, 2003. The vitamin supplement (n = 1677) contained 250 mg of vitamin C, 100 IU of vitamin E, and 37.5 µg of selenium or placebo (n = 1688), given twice daily. We call this intervention “vitamin treatment.” The garlic supplement (n = 1678) contained 400 mg of Kyolic aged garlic extract (Wakunaga Pharmaceutical Co., Osaka, Japan) and 2 mg of steam-distilled garlic oil or placebo (n = 1687), given twice daily. Bottles with garlic placebo capsules contained trace amounts of steam-distilled garlic oil to preserve masking. We call this intervention “garlic treatment.” From December 1995 to May 1996, the vitamin supplement also contained beta-carotene (7.5 mg, twice daily). Garlic and vitamin supplements were not given in June and July of 1999, and garlic supplements were not given in September of 2002 (1).

## **Endpoints: Follow-up for Gastric Cancer Incidence and for Cause-Specific Mortality**

The primary endpoints were gastric cancer incidence and mortality; secondary endpoints included death from gastric or esophageal cancer, death from any cancer, and mortality from any cause. Gastric cancer incidence was ascertained either from scheduled gastroscopies, with biopsies at seven standard sites, for all trial participants in 1999 and 2003; from gastroscopies conducted from May 2, 2003 to August 1, 2010 for those diagnosed with moderate or severe dysplasia at any biopsy site or with mild dysplasia at two or more sites in 2003 (285 participants had one or more endoscopic examinations with biopsies during the extended follow-up); or from cancer registry or autopsy reports, which were supported by medical records. Gastroscopy and biopsy procedures and histopathologic criteria are described elsewhere (3, 4). Study participants were visited monthly for distribution of supplements through March of 2003, and initial trial

follow-up ended on May 1, 2003. During the extended follow-up from May 2, 2003, to August 1, 2010, a village doctor supervised the follow-up in each village. Staff from the Beijing Institute of Cancer Research visited each village every 3 months to gather information on gastric cancer incidence and cause-specific mortality. Patients diagnosed with gastric cancer were interviewed, and their hospital records were reviewed to determine the method of diagnosis and the location of the cancer in the stomach. Copies of pathology and other medical reports were acquired. Causes of death were obtained from death certificates and hospital records. Deaths were categorized as death with a gastric cancer diagnosis before or at the time of death. In secondary analyses, we assessed death with gastric or esophageal cancer diagnosed before or at the time of death; death with any cancer (except nonmelanoma skin cancer) diagnosed before or at the time of death; and death from any cause.

### **Statistical Analysis**

Intention-to-treat analyses were performed. Odds ratios (ORs) of gastric cancer incidence and corresponding 95% confidence intervals (CIs) were estimated from conditional logistic regression. The regression models included indicators for treatment and the following covariates: age (<40, 40–44, 45–54, ≥55 years), sex (male, female), ever smoker (yes, no), and ever drinker of alcohol (yes, no). The age categories were chosen so that approximately one-quarter of the participants fell into each category. These analyses were stratified on baseline histopathology in 1994 into 1) moderate chronic atrophic gastritis or less severe; 2) severe chronic atrophic gastritis or superficial intestinal metaplasia; 3) deep intestinal metaplasia; and 4) mild, moderate, or severe dysplasia. For analysis of *H. pylori* treatment, only participants who were *H. pylori*-seropositive in 1994 were included. Analogous stratification and covariate adjustment were used to estimate mortality hazard ratios (HRs) and 95% confidence intervals for gastric cancer and other causes of death using Cox proportional hazards analyses on the scale of time since randomization (July 23, 1995). Schoenfeld residuals did not identify violations of the proportional hazards assumption for treatment main effects, nor did tests for interaction of treatment with time on study. All *P* values were two-sided, and *P* less than or equal to .05 was considered statistically significant. Analyses were performed using SAS software (version 9.2, SAS Institute, Cary, NC).

## **SUPPLEMENTARY RESULTS**

### **Alternative Covariate Adjustment for Gastric Cancer Incidence Data**

An alternative logistic analysis of the effects of *H. pylori* treatment on gastric cancer incidence in the *H. pylori*-seropositive stratum included indicator variables for each intervention, sex, age, and histopathology categories. The adjusted odds ratio for *H. pylori* treatment was 0.60 (95% CI = 0.38 to 0.94) with *P* value of .026. These results are very similar to those presented in Table 2.

### **Cause-specific Numbers of Deaths by Treatment in the Trial and in the Entire Study**

The cause-specific numbers of deaths are shown in Supplementary Table 1 below. Marginal counts are shown for each treatment and for the corresponding placebo group. These counts are listed separately for the Shandong Intervention Trial period ending on May 1, 2003, for the extended follow-up from May 2, 2003, to August 1, 2010, and for the entire trial plus extended follow-up period ending on August 1, 2010. From these data, one can determine whether treatment effects on a particular cause of mortality occurred during the trial, during the period of extended follow-up, or during both periods. For example, nine gastric cancer deaths occurred during the trial among those assigned to vitamins, compared with 12 deaths in the corresponding placebo group. During the extended follow-up, eight deaths occurred on vitamins, compared with 18 deaths on placebo.

### **Pooled Analysis of Trials of *H. pylori* treatments for Gastric Cancer Incidence**

A 2009 meta-analysis of seven randomized trials, including the Shandong Intervention Trial, concluded that *H. pylori* treatment reduced the incidence of gastric cancer (5). However, two of the reports (6,7) included in the meta-analysis concerned the same trial and reported inconsistent findings (8), and in another included trial (9), the primary endpoint was a new gastric cancer following a gastric cancer diagnosis. In an unreported pooled analysis that excluded those three trials, we calculated a relative risk of gastric cancer incidence of 0.69 (95% CI = 0.44 to 1.08), suggesting lingering uncertainty about the effectiveness of *H. pylori* treatment in preventing gastric cancer. When we combined our data from extended follow-up of the Shandong Intervention Trial with the counts of gastric cancers and population sizes from other published studies (5,8), but excluded the three trials (6,7,9), we estimated the relative risk of gastric cancer

incidence as 0.66 (95% CI = 0.46 to 0.95), with a *P* value of .027 (Supplementary Table 2). When we also included data from the trial of second gastric cancers following a primary gastric cancer (9), the estimated relative risk was 0.58 (95% CI = 0.42 to 0.81), with a *P* value of .0014 (Supplementary Table 2). In these analyses, we pooled the gastric cancer counts and population sizes across studies and computed relative risks comparing the group on *H. pylori* treatment vs the group on placebo by analyzing the ratio of binomial proportions with the use of StatXact-3 statistical software (Cytel Software Corporation, Cambridge, MA, 1995). All statistical tests were two-sided.

**Supplementary Table 1.** Cause-specific numbers of deaths by treatment group during the trial through May 1, 2003, during the extended follow-up from May 2, 2003 through August 1, 2010, and during the entire study through August 1, 2010\*

| Treatment, study period               | Cause of death |                   |              |        |                      |          |       |       |
|---------------------------------------|----------------|-------------------|--------------|--------|----------------------|----------|-------|-------|
|                                       | Gastric cancer | Esophageal cancer | Other cancer | Stroke | Other cardiovascular | Accident | Other | Total |
| <i>H. pylori</i> treatment (n = 1130) |                |                   |              |        |                      |          |       |       |
| Trial only                            | 8              | 7                 | 17           | 12     | 6                    | 8        | 9     | 67    |
| Extension                             | 9              | 5                 | 24           | 19     | 14                   | 7        | 12    | 90    |
| Entire study                          | 17             | 12                | 41           | 31     | 20                   | 15       | 21    | 157   |
| Placebo (n = 1128)                    |                |                   |              |        |                      |          |       |       |
| Trial only                            | 10             | 6                 | 15           | 5      | 10                   | 6        | 6     | 58    |
| Extension                             | 14             | 1                 | 23           | 13     | 15                   | 8        | 10    | 84    |
| Entire study                          | 24             | 7                 | 38           | 18     | 25                   | 14       | 16    | 142   |
| Garlic (n = 1678)                     |                |                   |              |        |                      |          |       |       |
| Trial only                            | 12             | 6                 | 25           | 13     | 14                   | 13       | 12    | 95    |
| Extension                             | 9              | 3                 | 34           | 27     | 16                   | 8        | 22    | 119   |
| Entire study                          | 21             | 9                 | 59           | 40     | 30                   | 21       | 34    | 214   |
| Placebo (n = 1687)                    |                |                   |              |        |                      |          |       |       |
| Trial only                            | 9              | 8                 | 23           | 11     | 13                   | 7        | 17    | 88    |
| Extension                             | 17             | 5                 | 31           | 17     | 25                   | 9        | 21    | 125   |
| Entire study                          | 26             | 13                | 54           | 28     | 38                   | 16       | 38    | 213   |
| Vitamins (n = 1677)                   |                |                   |              |        |                      |          |       |       |
| Trial only                            | 9              | 5                 | 27           | 10     | 8                    | 12       | 11    | 82    |
| Extension                             | 8              | 3                 | 36           | 21     | 25                   | 7        | 19    | 119   |
| Entire study                          | 17             | 8                 | 63           | 31     | 33                   | 19       | 30    | 201   |
| Placebo (n = 1688)                    |                |                   |              |        |                      |          |       |       |
| Trial only                            | 12             | 9                 | 21           | 14     | 19                   | 8        | 18    | 101   |
| Extension                             | 18             | 5                 | 29           | 23     | 16                   | 10       | 24    | 125   |
| Entire study                          | 30             | 14                | 50           | 37     | 35                   | 18       | 42    | 226   |

\* The number of subjects assigned to *H. pylori* treatment or its corresponding placebo is smaller than the number assigned to garlic or vitamins or the corresponding placebos because only subjects who were *H. pylori*-seropositive at baseline were assigned to *H. pylori* treatment or the corresponding placebo. The total number of deaths in the entire study was 427, which is the sum of the number of deaths on the active treatment arm and on the placebo arm, both for vitamins and for garlic treatments.

**Supplementary Table 2.** Combined analysis of *H. pylori* treatment effects on gastric cancer (GC) incidence in randomized trials\*

| First author, year of publication (reference) | No. of incident GC/<br>No. of patients on <i>H. pylori</i> treatment | No. of incident GC/<br>No. of patients on placebo | Comments                                                 |
|-----------------------------------------------|----------------------------------------------------------------------|---------------------------------------------------|----------------------------------------------------------|
| Correa, 2000 (10)                             | 3/491                                                                | 2/485                                             |                                                          |
| Wong, 2004 (11)                               | 7/817                                                                | 11/813                                            |                                                          |
| Saito, 2005 (12)                              | 2/379                                                                | 3/313                                             |                                                          |
| Ma, 2012 (this study)                         | 34/1130                                                              | 52/1128                                           |                                                          |
| Subtotal                                      | 46/2817                                                              | 68/2739                                           | RR = 0.66, 95% CI = 0.46 to 0.95 ( <i>P</i> = .027)      |
| Fukase, 2008 (9)                              | 9/272                                                                | 24/272                                            | Secondary GC incidence following treatment of primary GC |
| Total                                         | 55/3089                                                              | 92/3011                                           | RR = 0.58, 95% CI = 0.42 to 0.81 ( <i>P</i> = .0014)     |
| Leung, 2004 (6)                               | 4/295                                                                | 6/292                                             | Excluded                                                 |
| Zhou, 2008 (7)                                | 2/276                                                                | 7/276                                             | Excluded                                                 |

\* All references and data (except for this study) were taken from the meta-analysis by Fuccio et al. (5). The last two papers were not included in the combined analysis because of possible redundancy and inconsistency as discussed in a correspondence (8) regarding the original meta-analysis. RR = relative risk; CI = confidence interval.

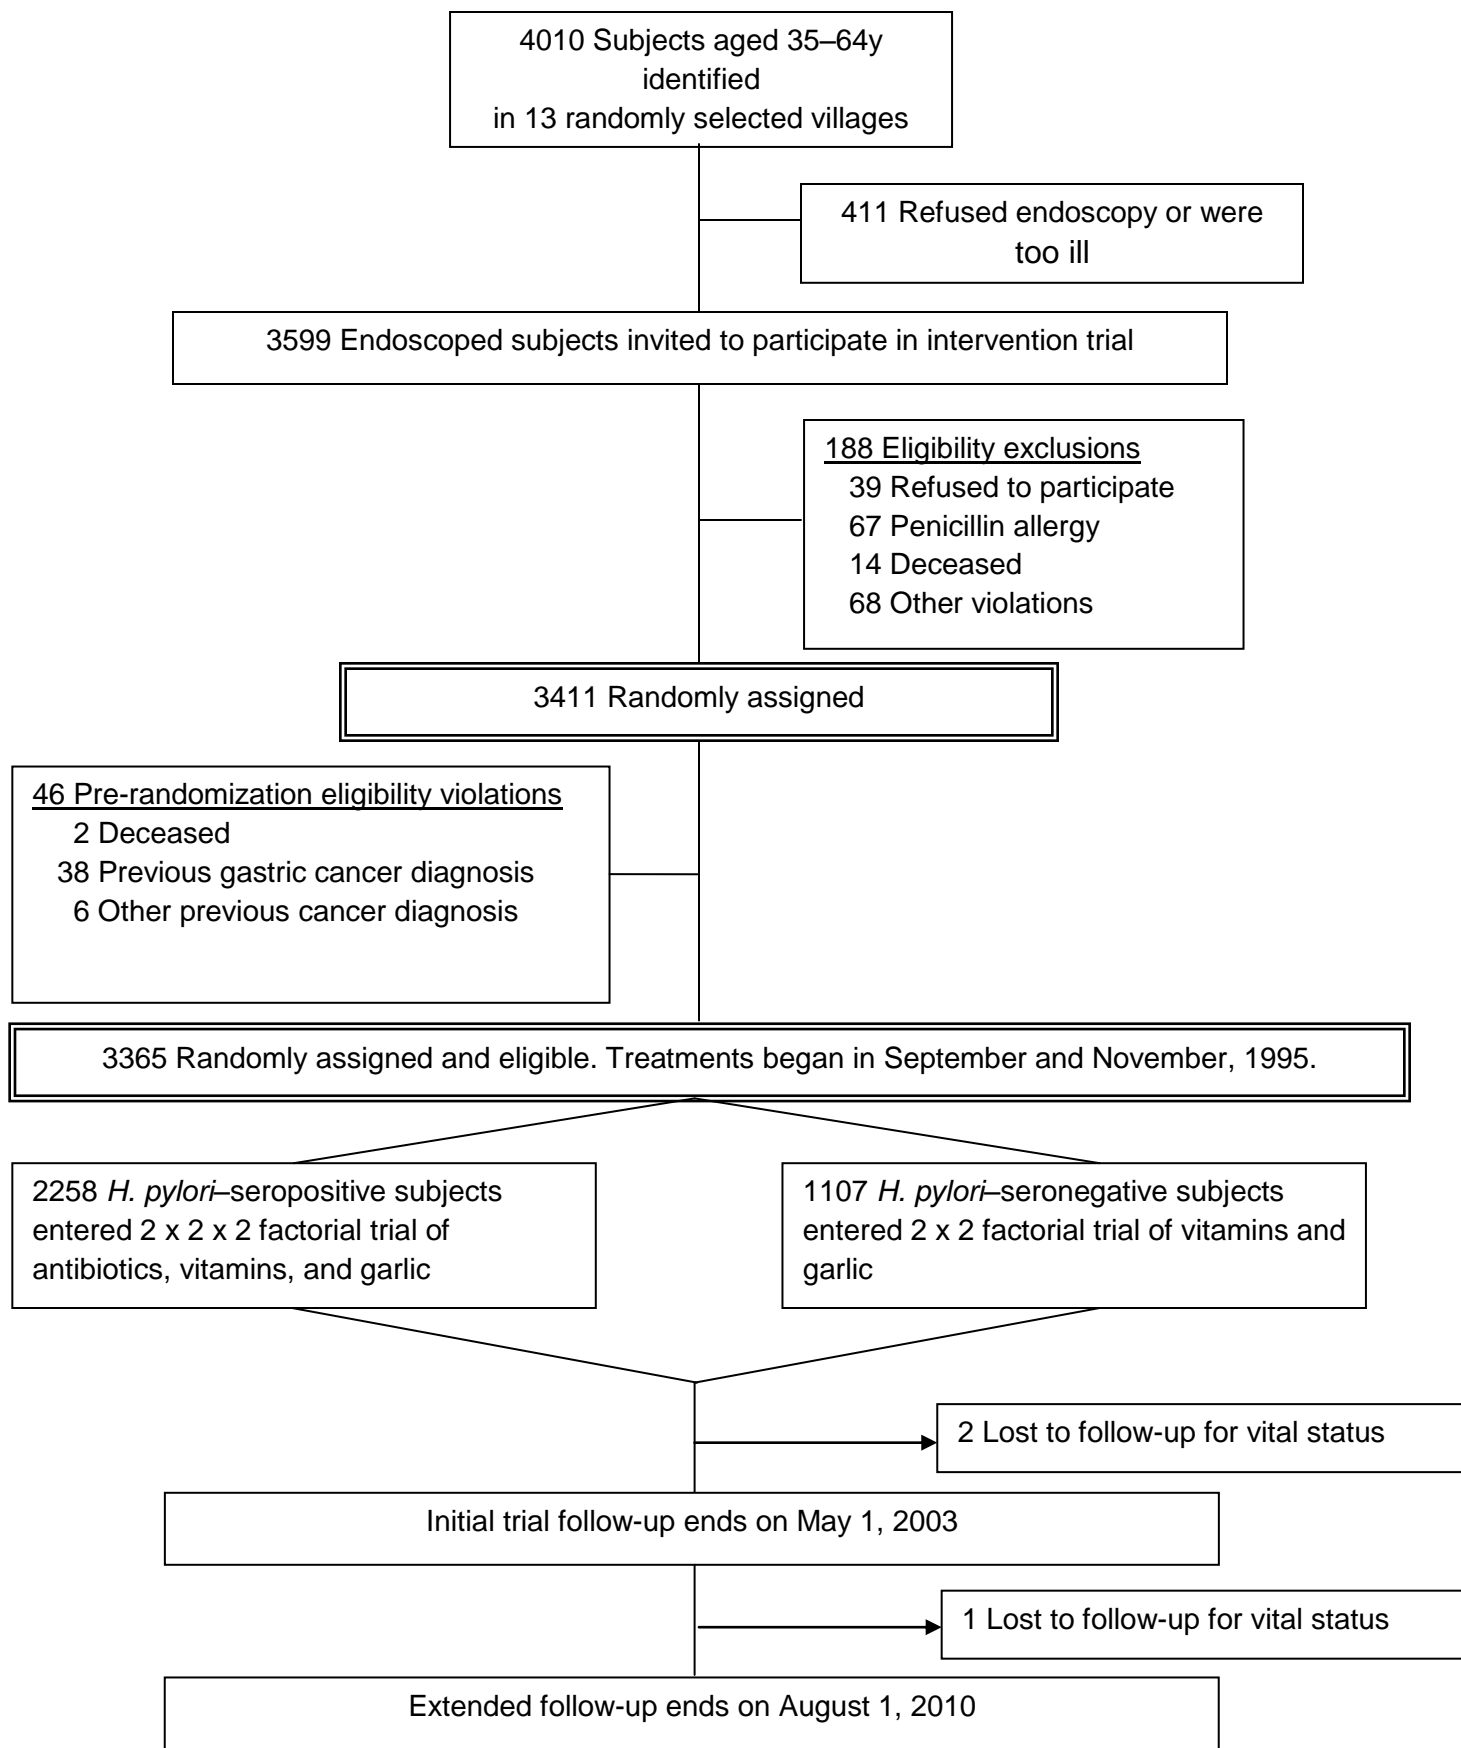

**Supplementary Figure 1.** Trial design, accrual, and follow-up of trial participants.



## References

1. You WC, Brown LM, Zhang L, Li JY, Jin ML, Chang YS, Ma JL, Pan KF, Liu WD, Hu YR, Crystal-Mansour S, Pee D, Blot WJ, Fraumeni JF, Xu GW, Gail MH. Randomized double-blind factorial trial of three treatments to reduce the prevalence of precancerous gastric lesions. *Journal of the National Cancer Institute* 2006;98(14):974-983.
2. Gail MH, You WC, Chang YS, Zhang L, Blot WJ, Brown LM, Groves FD, Heinrich JP, Hu J, Jin ML, Li JY, Liu WD, Ma JL, Mark SD, Rabkin CS, Fraumeni JF, Xu GW. Factorial trial of three interventions to reduce the progression of precancerous gastric lesions in shandong, China: Design issues and initial data. *Controlled Clinical Trials* 1998;19(4):352-369.
3. You WC, Blot WJ, Li JY, Chang YS, Jin ML, Kneller R, Zhang L, Han ZX, Zeng XR, Liu WD, Zhao L, Correa P, Fraumeni JF, Xu GW. Precancerous gastric lesions in a population at high risk of stomach cancer. *Cancer Research* 1993;53(6):1317-1321.
4. You WC, Li JY, Blot WJ, Chang YS, Jin ML, Gail MH, Zhang L, Liu WD, Ma JL, Hu YR, Mark SD, Correa P, Fraumeni JF, Xu GW. Evolution of precancerous lesions in a rural Chinese population at high risk of gastric cancer. *International Journal of Cancer* 1999;83(5):615-619.
5. Fuccio L, Zagari RM, Eusebi LH, Laterza L, Cennamo V, Ceroni L, Grilli D, Bazzoli F. Meta-analysis: Can Helicobacter pylori Eradication Treatment Reduce the Risk for Gastric Cancer? *Annals of Internal Medicine* 2009;151(2):121-132.
6. Leung WK, Lin SR, Ching JYL, To KF, Ng EKW, Chan FKL, Lau JYW, Sung JJY. Factors predicting progression of gastric intestinal metaplasia: results of a randomised trial on Helicobacter pylori eradication. *Gut* 2004;53(9):1244-1249.
7. Zhou LY. Ten-year follow-up study on the incidence of gastric cancer and the pathological changes of gastric mucosa after H. pylori eradication in China. *Gastroenterology* 2008;134(4):A233-A233.
8. Fuccio L, Eusebi LH, Bazzoli F. Redundant Data in the Meta-analysis on Helicobacter pylori Eradication RESPONSE. *Annals of Internal Medicine* 2009;151(7):513-514.
9. Fukase K, Kato M, Kikuchi S, Inoue K, Uemura N, Okamoto S, Terao S, Amagai K, Hayashi S, Asaka M. Effect of eradication of Helicobacter pylori on incidence of metachronous gastric carcinoma after endoscopic resection of early gastric cancer: an open-label, randomised controlled trial. *Lancet* 2008;372(9636):392-397.
10. Correa P, Fontham ETH, Bravo JC, Bravo LE, Ruiz B, Zarama G, Realpe JL, Malcom GT, Li D, Johnson WD, Mera R. Chemoprevention of gastric dysplasia: Randomized trial

of antioxidant supplements and anti-Helicobacter pylori therapy. *Journal of the National Cancer Institute* 2000;92(23):1881-1888.

11. Wong BCY, Lam SK, Wong WM, Chen JS, Zheng TT, Feng RE, Lai KC, Hu WHC, Yuen ST, Leung SY, Fong DYT, Ho J, Ching CK. Helicobacter pylori eradication to prevent gastric cancer in a high-risk region of China - A randomized controlled trial. *Jama-Journal of the American Medical Association* 2004;291(2):187-194.
12. Saito D, Boku N, Fujioka T, Fukuda Y, Matsushima Y, Sakaki N, Sato K, Sugiyama T, Takahashi S, Sato T, Emura F, Gotoda T, Wakabayashi K, Kakizoe T. Impact of H-pylori eradication on gastric cancer prevention: Endoscopic results of the Japanese intervention trial (JITHP-study). A Randomized multi-center trial. *Gastroenterology* 2005;128(4):A4-A4.
